# Supplementary material for: Development and Validation of a Nomogram to Predict risk of Sepsis in Non-ventilator Hospital- Acquired Pneumonia
Source: Research Square preprint supplement (doi:10.21203/rs.3.rs-7847940/v1), 2025-11-28
Supplement: Supplementary file 1 [file 68046df94068216179539e7d.docx]

**Development and Validation of a Nomogram to Predict risk of Sepsis in Non-ventilator Hospital-Acquired Pneumonia**

**Supplementary Table 1. Baseline characteristics of external validation sets**

| **Variables** | **External Validation set (N=68)** | | | |
| --- | --- | --- | --- | --- |
| sepsis  (n=36) | non-sepsis  (n=32) | P value |
| Gender(male) | 20 (57.1%) | 15 (42.9%) | 0.475 |
| Coagulation dysfunction | 27 (61.4%) | 17 (38.6%) | 0.077 |
| Acute myocardial infarction | 6 (16.7%) | 3 (9.4%) | 0.484 |
| Chronic kidney disease | 4 (11.1%) | 2 (6.3%) | 0.676 |
| Respiratory diseases | 10 (27.8%) | 8 (25.0%) | 0.067 |
| Oxygenation index | 325.26±19.18 | 340.42±26.18 | 0.251 |
| Platelet count | 152.83±17.29 | 188.41±18.35 | 0.047 |
| Bilirubin | 27.31±4.66 | 21.22±1.24 | 0.489 |
