# Supplementary material for: Development and Validation of a Nomogram to Predict risk of Sepsis in Non-ventilator Hospital- Acquired Pneumonia
Source: Research Square preprint supplement (doi:10.21203/rs.3.rs-7847940/v1), 2025-11-28

Supplementary Figure 1. Receiver operating characteristic (ROC) curve of the nomogram model in the external validation cohort.

The area under the curve (AUC) was calculated to evaluate the discriminative performance of the model. An AUC closer to 1.0 indicates better discrimination. In the external validation set, the nomogram showed an AUC of 0.64, suggesting moderate discriminatory ability.

Supplementary Figure 2. Calibration curve of the nomogram model in the external validation cohort.

The x-axis represents the predicted probability of sepsis, and the y-axis represents the observed frequency. The 45-degree gray dashed line represents perfect calibration. The calibration curve showed an acceptable agreement between predicted and observed outcomes in the external dataset.

Supplementary Figure 3. Decision curve analysis (DCA) of the nomogram model in the external validation cohort.

The red line indicates the net benefit of the nomogram, compared with the "treat-all" (gray line) and "treat-none" (black line) strategies. The nomogram demonstrated a higher net clinical benefit across a range of threshold probabilities, supporting its potential usefulness in clinical decision-making.


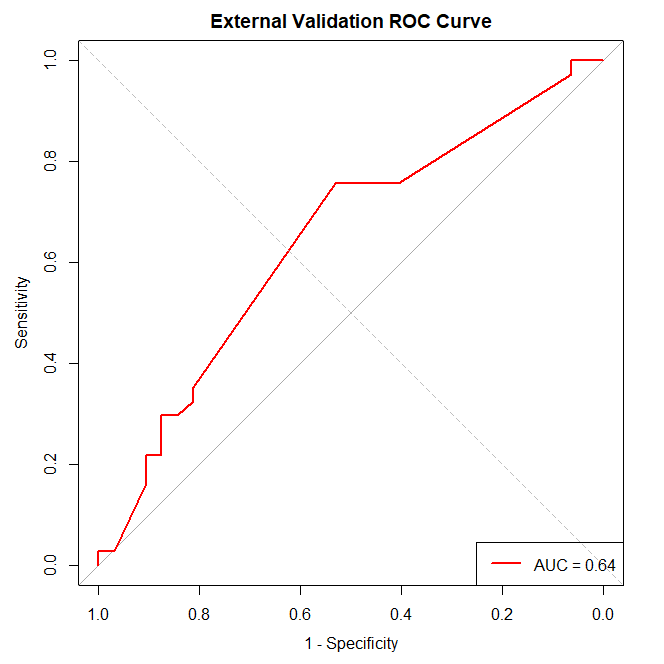

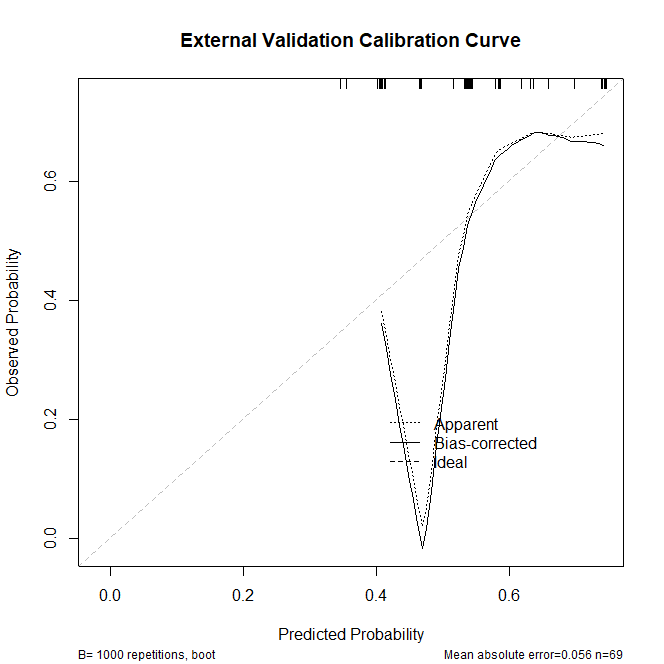

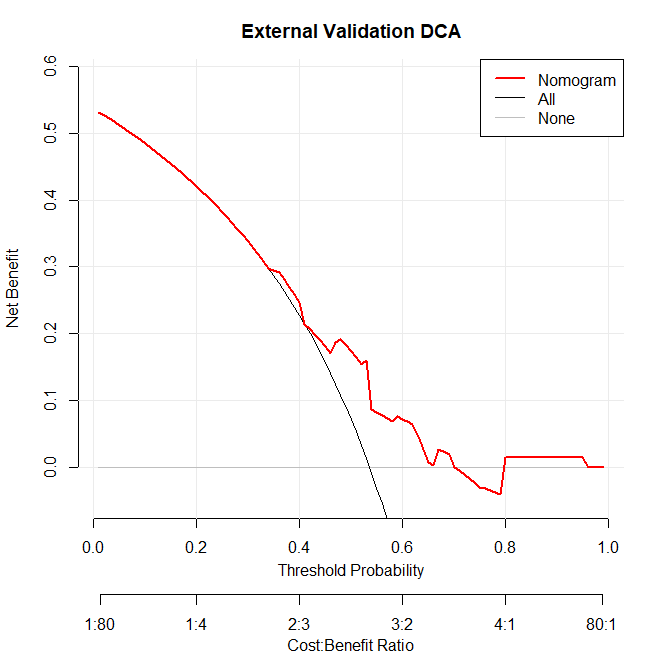

Supplement: Supplementary file 2 [file 801918903dd28a1de5c9653a.docx]
