# Supplementary material for: Development and Validation of a Nomogram to Predict risk of Sepsis in Non-ventilator Hospital- Acquired Pneumonia
Source: Research Square preprint supplement (doi:10.21203/rs.3.rs-7847940/v1), 2025-11-28
Supplement: Supplementary file 3 [file 98c6427a485052ce13c1f91d.docx]

**Definition and Clinical Interpretation of Predictive Variables**

The following variables were independently associated with progression to sepsis in patients with NV-HAP. All variables were measured within 24 hours following NV-HAP diagnosis. Definitions, units, and threshold values were determined in reference to standard clinical practice and the Sepsis-3 consensus definition.

**1. Male Sex**

Definition: Male = 1, Female = 0

**2. Coagulation Dysfunction**

Definition: Coagulation dysfunction was defined as either: Activated Partial Thromboplastin Time (APTT) > 40 seconds, or D-dimer > 2.0 µg/mL (fibrinogen equivalent units, FEU)

Value type: Binary (Yes =1, No = 0)

Reference ranges:

APTT: 25–35 seconds (normal); >40 seconds considered prolonged.

D-dimer: <0.5 µg/mL (normal); >2.0 µg/mL indicative of systemic activation of coagulation.

**3. Acute Myocardial Infarction (AMI)**

Definition: Documented diagnosis of AMI during hospitalization, based on clinical, laboratory (e.g., troponin), and ECG findings.

Value type: Binary (Yes =1, No = 0)

**4. Chronic Kidney Disease (CKD)**

Definition: History of chronic kidney disease stage 3 or higher （Estimated glomerular filtration rate (eGFR) <60 mL/min/1.73 m² for ≥3 months）, with or without renal replacement therapy.

Value type: Binary (Yes =1, No = 0)

**5. Underlying Respiratory Disease**

Definition: Presence of pre-existing structural or chronic respiratory conditions, including: Chronic obstructive pulmonary disease (COPD), Bronchiectasis，Interstitial lung disease， History of pulmonary tuberculosis

Value type: Binary (Yes =1, No = 0)

**6. Oxygenation Index (PaO₂/FiO₂ Ratio)**

Definition: Arterial oxygen partial pressure (PaO₂, mmHg) divided by the fraction of inspired oxygen (FiO₂, expressed as decimal).

Thresholds (SOFA respiratory subscore):

400: Normal (SOFA = 0)

301–400: Mild impairment (SOFA = 1)

201–300: Moderate impairment (SOFA = 2)

101–200 (with respiratory support): Severe impairment (SOFA = 3)

≤100 (with respiratory support): Very severe (SOFA = 4)

**7. Platelet Count**

Definition: Platelet count measured from complete blood count within 24 hours of NV-HAP diagnosis (Unit: ×10⁹/L).

SOFA scoring thresholds:

≥150: Normal (SOFA = 0)

101–149: Mild decrease (SOFA = 1)

51–100: Moderate (SOFA = 2)

21–50: Severe (SOFA = 3)

≤20: Very severe (SOFA = 4)

**8. Total Bilirubin**

Definition: Total serum bilirubin level within 24 hours post-diagnosis (Unit: mg/dL).

SOFA thresholds for hepatic subscore:

<1.2 mg/dL: Normal (SOFA = 0)

1.2–1.9: Mild elevation (SOFA = 1)

2.0–5.9: Moderate (SOFA = 2)

6.0–11.9: Severe (SOFA = 3)

≥12.0: Very severe (SOFA = 4)

All variables were selected based on clinical significance, availability within 24 hours, and consistency with sepsis-related pathophysiology. Their definitions and interpretations were standardized to facilitate model generalizability and practical application.
